# Supplementary material for: Diversity of Leptogium (Collemataceae, Ascomycota) in East African Montane Ecosystems
Source: Microorganisms. 2021 Feb 3;9(2):314. doi: 10.3390/microorganisms9020314 (PMC7913733; doi:10.3390/microorganisms9020314)
Supplement: Supplementary file 1 [file microorganisms-09-00314-s001.zip › Supplementary/TableS1.pdf]

**Table S1.** Collection information and GenBank Accession numbers for the mtSSU and nuITS sequences of the *Leptogium* specimens. The Clade refers to the clades shown in Figure S2.

| Clade   | Collection                   |           |                           | Forest/plot | NCBI Accession No. |          |
|---------|------------------------------|-----------|---------------------------|-------------|--------------------|----------|
|         |                              | number    | Collection locality       |             | mtSSU              | nuITS    |
| Clade A | <i>Leptogium burnetiae</i>   | UK170858a | Tanzania, Mt. Kilimanjaro | FPo4        | MW335165           | MW340225 |
| Clade B | <i>Leptogium</i> sp.         | JR10K131  | Kenya, Mt. Kasigau        | Kasigau N13 | MW335166           | MW340226 |
| Clade B | <i>Leptogium</i> sp.         | JR10K571  | Kenya, Mt. Kasigau        | Kasigau 57W | MW335167           | MW340227 |
| Clade C | <i>Leptogium</i> sp.         | JR10K332  | Kenya, Mt. Kasigau        | Kasigau S1  | MW335168           | MW340228 |
| Clade C | <i>Leptogium</i> sp.         | UK170998f | Tanzania, Mt. Kilimanjaro | Home 5      | MW335169           | MW340229 |
| Clade C | <i>Leptogium</i> sp.         | UK171150g | Tanzania, Mt. Kilimanjaro | FED4        | MW335170           | -        |
| Clade C | <i>Leptogium</i> sp.         | UK171397a | Tanzania, Mt. Kilimanjaro | FEr4        | MW335171           | MW340230 |
| Clade C | <i>Leptogium</i> OTU C1      | JR10K091b | Kenya, Mt. Kasigau        | Kasigau N9  | MW335172           | MW340231 |
| Clade C | <i>Leptogium</i> OTU C1      | UK160487d | Tanzania, Mt. Kilimanjaro | home 4      | MW335173           | -        |
| Clade C | <i>Leptogium</i> OTU C2      | JR10248B  | Kenya, Taita Hills        | Mwachora    | MW335174           | -        |
| Clade C | <i>Leptogium</i> OTU C2      | JR10248C  | Kenya, Taita Hills        | Mwachora    | MW335175           | -        |
| Clade C | <i>Leptogium</i> OTU C2      | JR10K171  | Kenya, Mt. Kasigau        | Kasigau E2  | MW335176           | MW340232 |
| Clade C | <i>Leptogium</i> OTU C2      | JR10K232  | Kenya, Mt. Kasigau        | Kasigau E8  | MW335177           | MW340233 |
| Clade C | <i>Leptogium</i> OTU C2      | UK170967  | Tanzania, Mt. Kilimanjaro | Coffee 5    | MW335178           | MW340234 |
| Clade D | <i>Leptogium ethiopicum</i>  | UK170821b | Tanzania, Mt. Kilimanjaro | FPD4        | MW335179           | MW340235 |
| Clade D | <i>Leptogium ethiopicum</i>  | UK170845p | Tanzania, Mt. Kilimanjaro | FPD3        | MW335180           | MW340236 |
| Clade D | <i>Leptogium ethiopicum</i>  | UK171473e | Tanzania, Mt. Kilimanjaro | FPD1        | MW335181           | MW340237 |
| Clade D | <i>Leptogium ethiopicum</i>  | UK171486m | Tanzania, Mt. Kilimanjaro | FOc4        | MW335182           | -        |
| Clade D | <i>Leptogium ethiopicum</i>  | UK171510f | Tanzania, Mt. Kilimanjaro | FOD2        | MW335183           | MW340238 |
| Clade D | <i>Leptogium ethiopicum</i>  | UK171519j | Tanzania, Mt. Kilimanjaro | FOc5        | MW335184           | MW340239 |
| Clade D | <i>Leptogium ethiopicum</i>  | UK171577o | Tanzania, Mt. Kilimanjaro | FPD2        | MW335185           | MW340240 |
| Clade D | <i>Leptogium ethiopicum</i>  | UK171584f | Tanzania, Mt. Kilimanjaro | FPD2        | MW335186           | MW340241 |
| Clade D | <i>Leptogium ethiopicum</i>  | UK171586z | Tanzania, Mt. Kilimanjaro | FPo3        | MW335187           | MW340242 |
| Clade D | <i>Leptogium juressianum</i> | JR10072B  | Kenya, Taita Hills        | Vuria       | MW335188           | JX503813 |
| Clade D | <i>Leptogium juressianum</i> | JR11030C  | Kenya, Taita Hills        | Vuria       | -                  | JX503812 |
| Clade D | <i>Leptogium juressianum</i> | JR11031A  | Kenya, Taita Hills        | Vuria       | MW335189           | JX503814 |
| Clade D | <i>Leptogium juressianum</i> | JR11050C  | Kenya, Taita Hills        | Vuria       | MW335190           | JX503815 |
| Clade D | <i>Leptogium juressianum</i> | JR11067   | Kenya, Taita Hills        | Fururu      | MW335191           | JX503811 |
| Clade D | <i>Leptogium juressianum</i> | UK110535e | Tanzania, Mt. Kilimanjaro | Vuria       | MW335192           | -        |
| Clade D | <i>Leptogium juressianum</i> | UK170912d | Tanzania, Mt. Kilimanjaro | FOD5        | MW335193           | MW340243 |
| Clade D | <i>Leptogium juressianum</i> | UK170953a | Tanzania, Mt. Kilimanjaro | FIm1        | MW335194           | MW340244 |
| Clade D | <i>Leptogium juressianum</i> | UK171182h | Tanzania, Mt. Kilimanjaro | FOD3        | MW335195           | MW340245 |
| Clade D | <i>Leptogium krogiae</i>     | JR_A45_R1 | Kenya, Taita Hills        | Ngangao     | -                  | JX503786 |
| Clade D | <i>Leptogium krogiae</i>     | JR10074A  | Kenya, Taita Hills        | Vuria       | -                  | JX503796 |
| Clade D | <i>Leptogium krogiae</i>     | JR10088B  | Kenya, Taita Hills        | Vuria       | -                  | JX503795 |
| Clade D | <i>Leptogium krogiae</i>     | JR10116A  | Kenya, Taita Hills        | Vuria       | -                  | JX503793 |
| Clade D | <i>Leptogium krogiae</i>     | JR10148   | Kenya, Taita Hills        | Ngangao     | -                  | JX503784 |
| Clade D | <i>Leptogium krogiae</i>     | JR10158B  | Kenya, Taita Hills        | Yale        | -                  | JX503787 |
| Clade D | <i>Leptogium krogiae</i>     | JR10182C  | Kenya, Taita Hills        | Yale        | -                  | JX503797 |
| Clade D | <i>Leptogium krogiae</i>     | JR10192A  | Kenya, Taita Hills        | Yale        | -                  | JX503788 |
| Clade D | <i>Leptogium krogiae</i>     | JR10199A  | Kenya, Taita Hills        | Yale        | -                  | JX503798 |
| Clade D | <i>Leptogium krogiae</i>     | JR10201A  | Kenya, Taita Hills        | Yale        | -                  | JX503799 |
| Clade D | <i>Leptogium krogiae</i>     | JR10204   | Kenya, Taita Hills        | Yale        | -                  | JX503800 |
| Clade D | <i>Leptogium krogiae</i>     | JR10210A  | Kenya, Taita Hills        | Yale        | -                  | JX503801 |
| Clade D | <i>Leptogium krogiae</i>     | JR10222A  | Kenya, Taita Hills        | Mwachora    | -                  | JX503785 |
| Clade D | <i>Leptogium krogiae</i>     | JR10226A  | Kenya, Taita Hills        | Mwachora    | -                  | JX503791 |
| Clade D | <i>Leptogium krogiae</i>     | JR10226B  | Kenya, Taita Hills        | Mwachora    | -                  | JX503792 |
| Clade D | <i>Leptogium krogiae</i>     | JR10242   | Kenya, Taita Hills        | Mwachora    | -                  | JX503790 |
| Clade D | <i>Leptogium krogiae</i>     | JR10252A  | Kenya, Taita Hills        | Mwachora    | -                  | JX503794 |
| Clade D | <i>Leptogium krogiae</i>     | JR10259A  | Kenya, Taita Hills        | Mwachora    | -                  | JX503789 |
| Clade D | <i>Leptogium krogiae</i>     | JR11012B  | Kenya, Taita Hills        | Vuria       | MW335196           | JX503802 |
| Clade D | <i>Leptogium krogiae</i>     | JR11039A  | Kenya, Taita Hills        | Vuria       | -                  | JX503803 |
| Clade D | <i>Leptogium krogiae</i>     | JR11054A  | Kenya, Taita Hills        | Vuria       | -                  | JX503804 |
| Clade D | <i>Leptogium krogiae</i>     | UK110507c | Kenya, Taita Hills        | Ngangao     | MW335197           | -        |

| Clade   |                             | Collection<br>number | Collection locality       | Forest/plot  | NCBI Accession No.<br>mtSSU | nuITS    |
|---------|-----------------------------|----------------------|---------------------------|--------------|-----------------------------|----------|
| Clade D | <i>Leptogium krogiae</i>    | UK170804f            | Tanzania, Mt. Kilimanjaro | FOc1         | MW335198                    | MW340246 |
| Clade D | <i>Leptogium krogiae</i>    | UK170882c            | Tanzania, Mt. Kilimanjaro | FPo5         | MW335199                    | MW340247 |
| Clade D | <i>Leptogium krogiae</i>    | UK170897aq           | Tanzania, Mt. Kilimanjaro | FOD4         | MW335200                    | MW340248 |
| Clade D | <i>Leptogium krogiae</i>    | UK170910a            | Tanzania, Mt. Kilimanjaro | FOD5         | MW335201                    | MW340249 |
| Clade D | <i>Leptogium krogiae</i>    | UK170933a            | Tanzania, Mt. Kilimanjaro | Flm1         | MW335202                    | MW340250 |
| Clade D | <i>Leptogium krogiae</i>    | UK171182g            | Tanzania, Mt. Kilimanjaro | FOD3         | MW335203                    | -        |
| Clade D | <i>Leptogium krogiae</i>    | UK171480b            | Tanzania, Mt. Kilimanjaro | FOc4         | MW335204                    | MW340251 |
| Clade D | <i>Leptogium krogiae</i>    | UK171486p            | Tanzania, Mt. Kilimanjaro | FOc4         | MW335205                    | MW340252 |
| Clade D | <i>Leptogium krogiae</i>    | UK171489a            | Tanzania, Mt. Kilimanjaro | FOc3         | MW335206                    | MW340253 |
| Clade D | <i>Leptogium krogiae</i>    | UK171497h            | Tanzania, Mt. Kilimanjaro | FOD1         | MW335207                    | MW340254 |
| Clade D | <i>Leptogium krogiae</i>    | UK171505b            | Tanzania, Mt. Kilimanjaro | FOD2         | MW335208                    | MW340255 |
| Clade D | <i>Leptogium krogiae</i>    | UK171508g            | Tanzania, Mt. Kilimanjaro | FOD2         | MW335209                    | MW340256 |
| Clade D | <i>Leptogium krogiae</i>    | UK171519m            | Tanzania, Mt. Kilimanjaro | FOc5         | MW335210                    | MW340257 |
| Clade D | <i>Leptogium krogiae</i>    | UK171523d            | Tanzania, Mt. Kilimanjaro | FPo2         | MW335211                    | MW340258 |
| Clade D | <i>Leptogium krogiae</i>    | UK171577p            | Tanzania, Mt. Kilimanjaro | FPD2         | MW335212                    | MW340259 |
| Clade D | <i>Leptogium krogiae</i>    | UK171586r            | Tanzania, Mt. Kilimanjaro | FPo3         | MW335213                    | MW340260 |
| Clade D | <i>Leptogium resupinans</i> | UK171433b            | Tanzania, Mt. Kilimanjaro | FEr3         | MW335214                    | MW340261 |
| Clade D | <i>Leptogium resupinans</i> | UK171438e            | Tanzania, Mt. Kilimanjaro | FEr2         | MW335215                    | MW340262 |
| Clade D | <i>Leptogium resupinans</i> | UK171458e            | Tanzania, Mt. Kilimanjaro | FEr4         | MW335216                    | MW340263 |
| Clade D | <i>Leptogium</i> sp.        | UK171504q            | Tanzania, Mt. Kilimanjaro | FOD2         | MW335217                    | MW340264 |
| Clade D | <i>Leptogium</i> OTU D1     | UK170774f            | Tanzania, Mt. Kilimanjaro | FPo1         | MW335218                    | MW340265 |
| Clade D | <i>Leptogium</i> OTU D1     | UK171458f            | Tanzania, Mt. Kilimanjaro | FEr4         | MW335219                    | MW340266 |
| Clade D | <i>Leptogium</i> OTU D1     | UK171468v            | Tanzania, Mt. Kilimanjaro | FPD1         | MW335220                    | MW340267 |
| Clade D | <i>Leptogium</i> OTU D1     | UK171577l            | Tanzania, Mt. Kilimanjaro | FPD2         | MW335221                    | MW340268 |
| Clade D | <i>Leptogium</i> OTU D1     | UK171586t            | Tanzania, Mt. Kilimanjaro | FPo3         | MW335222                    | MW340269 |
| Clade D | <i>Leptogium</i> OTU D2     | JR010030F            | Kenya, Taita Hills        | Shomoto Hill | MW335223                    | -        |
| Clade D | <i>Leptogium</i> OTU D2     | JR10072A             | Kenya, Taita Hills        | Vuria        | MW335224                    | JX503807 |
| Clade D | <i>Leptogium</i> OTU D2     | JR10104              | Kenya, Taita Hills        | Vuria        | MW335225                    | JX503808 |
| Clade D | <i>Leptogium</i> OTU D2     | JR11030B             | Kenya, Taita Hills        | Vuria        | -                           | JX503809 |
| Clade D | <i>Leptogium</i> OTU D2     | JR11034B             | Kenya, Taita Hills        | Vuria        | -                           | JX503810 |
| Clade D | <i>Leptogium</i> OTU D2     | UK170778d            | Tanzania, Mt. Kilimanjaro | FPo1         | MW335226                    | MW340270 |
| Clade D | <i>Leptogium</i> OTU D2     | UK170781a            | Tanzania, Mt. Kilimanjaro | FPo1         | MW335227                    | MW340271 |
| Clade D | <i>Leptogium</i> OTU D2     | UK170789a            | Tanzania, Mt. Kilimanjaro | FOc2         | MW335228                    | MW340272 |
| Clade D | <i>Leptogium</i> OTU D2     | UK170806h            | Tanzania, Mt. Kilimanjaro | FPD4         | MW335229                    | MW340273 |
| Clade D | <i>Leptogium</i> OTU D2     | UK170915c            | Tanzania, Mt. Kilimanjaro | FOD5         | MW335230                    | MW340274 |
| Clade D | <i>Leptogium</i> OTU D2     | UK170922a            | Tanzania, Mt. Kilimanjaro | Flm6         | MW335231                    | MW340275 |
| Clade D | <i>Leptogium</i> OTU D2     | UK170950j            | Tanzania, Mt. Kilimanjaro | Flm1         | MW335232                    | MW340276 |
| Clade D | <i>Leptogium</i> OTU D2     | UK171181c            | Tanzania, Mt. Kilimanjaro | FOD3         | MW335233                    | MW340277 |
| Clade D | <i>Leptogium</i> OTU D2     | UK171267b            | Tanzania, Mt. Kilimanjaro | Hel1         | MW335234                    | MW340278 |
| Clade D | <i>Leptogium</i> OTU D2     | UK171340o            | Tanzania, Mt. Kilimanjaro | FED1         | MW335235                    | MW340279 |
| Clade D | <i>Leptogium</i> OTU D2     | UK171472a            | Tanzania, Mt. Kilimanjaro | FPD1         | MW335236                    | MW340280 |
| Clade D | <i>Leptogium</i> OTU D2     | UK171495c            | Tanzania, Mt. Kilimanjaro | FOc3         | MW335237                    | MW340281 |
| Clade D | <i>Leptogium</i> OTU D2     | UK171510q            | Tanzania, Mt. Kilimanjaro | FOD2         | MW335238                    | MW340282 |
| Clade D | <i>Leptogium</i> OTU D2     | UK171529e            | Tanzania, Mt. Kilimanjaro | FPo2         | MW335239                    | MW340283 |
| Clade D | <i>Leptogium</i> OTU D2     | UK171586af           | Tanzania, Mt. Kilimanjaro | FPo3         | MW335240                    | MW340284 |
| Clade D | <i>Leptogium</i> OTU D3     | JR10097Ab            | Kenya, Taita Hills        | Vuria        | MW335241                    | -        |
| Clade D | <i>Leptogium</i> OTU D3     | JR10252B             | Kenya, Taita Hills        | Mwachora     | MW335242                    | JX503806 |
| Clade D | <i>Leptogium</i> OTU D3     | UK170792f            | Tanzania, Mt. Kilimanjaro | FOc2         | MW335243                    | MW340285 |
| Clade D | <i>Leptogium</i> OTU D3     | UK170794j            | Tanzania, Mt. Kilimanjaro | FOc2         | MW335244                    | MW340286 |
| Clade D | <i>Leptogium</i> OTU D3     | UK170797d            | Tanzania, Mt. Kilimanjaro | FOc1         | MW335245                    | MW340287 |
| Clade D | <i>Leptogium</i> OTU D3     | UK170900f            | Tanzania, Mt. Kilimanjaro | FOD4         | MW335246                    | MW340288 |
| Clade D | <i>Leptogium</i> OTU D3     | UK170929a            | Tanzania, Mt. Kilimanjaro | Flm6         | MW335247                    | MW340289 |
| Clade D | <i>Leptogium</i> OTU D3     | UK170935n            | Tanzania, Mt. Kilimanjaro | Flm1         | MW335248                    | MW340290 |
| Clade D | <i>Leptogium</i> OTU D3     | UK171182e            | Tanzania, Mt. Kilimanjaro | FOD3         | MW335249                    | MW340291 |
| Clade D | <i>Leptogium</i> OTU D3     | UK171185i            | Tanzania, Mt. Kilimanjaro | FOD3         | MW335250                    | MW340292 |
| Clade D | <i>Leptogium</i> OTU D3     | UK171482b            | Tanzania, Mt. Kilimanjaro | FOc4         | MW335251                    | MW340293 |
| Clade D | <i>Leptogium</i> OTU D3     | UK171494d            | Tanzania, Mt. Kilimanjaro | FOc3         | MW335252                    | MW340294 |
| Clade D | <i>Leptogium</i> OTU D3     | UK171495b            | Tanzania, Mt. Kilimanjaro | FOc3         | MW335253                    | MW340295 |
| Clade D | <i>Leptogium</i> OTU D3     | UK171505f            | Tanzania, Mt. Kilimanjaro | FOD2         | MW335254                    | MW340296 |
| Clade D | <i>Leptogium</i> OTU D3     | UK171514f            | Tanzania, Mt. Kilimanjaro | FOc5         | MW335255                    | MW340297 |

| Clade   |                  |                    | Collection<br>number | Collection locality       | Forest/plot            | NCBI Accession No.<br>mtSSU | nuITS    |
|---------|------------------|--------------------|----------------------|---------------------------|------------------------|-----------------------------|----------|
| Clade E | <i>Leptogium</i> | <i>caespitosum</i> | JR10014A             | Kenya, Taita Hills        | Taita Research Station | MW335256                    | JX503769 |
| Clade E | <i>Leptogium</i> | <i>caespitosum</i> | JR10016              | Kenya, Taita Hills        | Taita Research Station | MW335257                    | JX503768 |
| Clade E | <i>Leptogium</i> | <i>caespitosum</i> | JR10017b             | Kenya, Taita Hills        | Taita Research Station | MW335258                    | -        |
| Clade E | <i>Leptogium</i> | <i>caespitosum</i> | JR10K011             | Kenya, Mt. Kasigau        | Kasigau 1N             | MW335259                    | -        |
| Clade E | <i>Leptogium</i> | <i>caespitosum</i> | JR10K061B            | Kenya, Mt. Kasigau        | Kasigau 6N             | MW335260                    | MW340298 |
| Clade E | <i>Leptogium</i> | <i>caespitosum</i> | JR10K071b            | Kenya, Mt. Kasigau        | Kasigau 7N             | MW335261                    | MW340299 |
| Clade E | <i>Leptogium</i> | <i>caespitosum</i> | JR10K231             | Kenya, Mt. Kasigau        | Kasigau 23E            | MW335262                    | MW340300 |
| Clade E | <i>Leptogium</i> | <i>caespitosum</i> | JR10K401A            | Kenya, Mt. Kasigau        | Kasigau 40S            | MW335263                    | MW340301 |
| Clade E | <i>Leptogium</i> | <i>caespitosum</i> | JR10K401B            | Kenya, Mt. Kasigau        | Kasigau 40S            | MW335264                    | MW340302 |
| Clade E | <i>Leptogium</i> | <i>caespitosum</i> | JR10K402c            | Kenya, Mt. Kasigau        | Kasigau 40S            | -                           | MW340303 |
| Clade E | <i>Leptogium</i> | <i>caespitosum</i> | JR10K412             | Kenya, Mt. Kasigau        | Kasigau 41S            | MW335265                    | -        |
| Clade E | <i>Leptogium</i> | <i>marginellum</i> | JR10K251A            | Kenya, Mt. Kasigau        | Kasigau                | MW335266                    | MW340304 |
| Clade E | <i>Leptogium</i> | sp.                | JR11094A             | Kenya, Taita Hills        | Chawia                 | -                           | JX503818 |
| Clade E | <i>Leptogium</i> | OTU E1             | JR10013B             | Kenya, Taita Hills        | Taita Research Station | MW335267                    | JX503820 |
| Clade E | <i>Leptogium</i> | OTU E1             | JR10061              | Kenya, Taita Hills        | Shomoto Hill           | MW335268                    | JX503819 |
| Clade E | <i>Leptogium</i> | OTU E1             | JR10K042             | Kenya, Mt. Kasigau        | Kasigau N4             | MW335269                    | MW340305 |
| Clade E | <i>Leptogium</i> | OTU E1             | JR10K192             | Kenya, Mt. Kasigau        | Kasigau E4             | MW335270                    | MW340306 |
| Clade E | <i>Leptogium</i> | OTU E1             | UK160414b            | Tanzania, Mt. Kilimanjaro | Savanna 1              | MW335271                    | MW340307 |
| Clade E | <i>Leptogium</i> | OTU E1             | UK160424a            | Tanzania, Mt. Kilimanjaro | Savanna 1              | MW335272                    | -        |
| Clade E | <i>Leptogium</i> | OTU E1             | UK160440a            | Tanzania, Mt. Kilimanjaro | Savanna 2              | MW335273                    | MW340308 |
| Clade E | <i>Leptogium</i> | OTU E1             | UK170999a            | Tanzania, Mt. Kilimanjaro | Home 5                 | MW335274                    | MW340309 |
| Clade E | <i>Leptogium</i> | OTU E1             | UK171007a            | Tanzania, Mt. Kilimanjaro | Grass 5                | MW335275                    | MW340310 |
| Clade E | <i>Leptogium</i> | OTU E2             | JR10020              | Kenya, Taita Hills        | Taita Research Station | MW335276                    | JX503817 |
| Clade E | <i>Leptogium</i> | OTU E2             | JR10041Ab            | Kenya, Taita Hills        | Shomoto Hill           | MW335277                    | -        |
| Clade E | <i>Leptogium</i> | OTU E2             | JR10K012             | Kenya, Mt. Kasigau        | Kasigau N1             | -                           | JX503816 |
| Clade E | <i>Leptogium</i> | OTU E2             | JR10K234             | Kenya, Mt. Kasigau        | Kasigau E8             | MW335278                    | MW340311 |
| Clade E | <i>Leptogium</i> | OTU E2             | UK170994a            | Tanzania, Mt. Kilimanjaro | Home 5                 | MW335279                    | MW340312 |
| Clade E | <i>Leptogium</i> | OTU E3             | JR_X7B               | Kenya, Taita Hills        | Chawia                 | -                           | JX503760 |
| Clade E | <i>Leptogium</i> | OTU E3             | JR10016E             | Kenya, Taita Hills        | Taita Research Station | MW335280                    | -        |
| Clade E | <i>Leptogium</i> | OTU E3             | JR10059              | Kenya, Taita Hills        | Shomoto Hill           | -                           | JX503765 |
| Clade E | <i>Leptogium</i> | OTU E3             | JR10081B             | Kenya, Taita Hills        | Vuria                  | MW335281                    | -        |
| Clade E | <i>Leptogium</i> | OTU E3             | JR10100              | Kenya, Taita Hills        | Vuria                  | -                           | JX503771 |
| Clade E | <i>Leptogium</i> | OTU E3             | JR10120A             | Kenya, Taita Hills        | Vuria                  | MW335282                    | JX503772 |
| Clade E | <i>Leptogium</i> | OTU E3             | JR10123A             | Kenya, Taita Hills        | Vuria                  | MW335283                    | JX503773 |
| Clade E | <i>Leptogium</i> | OTU E3             | JR10123B             | Kenya, Taita Hills        | Vuria                  | MW335284                    | -        |
| Clade E | <i>Leptogium</i> | OTU E3             | JR10124              | Kenya, Taita Hills        | Vuria                  | MW335285                    | JX503774 |
| Clade E | <i>Leptogium</i> | OTU E3             | JR10126              | Kenya, Taita Hills        | Vuria                  | -                           | JX503770 |
| Clade E | <i>Leptogium</i> | OTU E3             | JR10156A             | Kenya, Taita Hills        | Yale                   | -                           | JX503761 |
| Clade E | <i>Leptogium</i> | OTU E3             | JR10156B             | Kenya, Taita Hills        | Yale                   | MW335286                    | JX503762 |
| Clade E | <i>Leptogium</i> | OTU E3             | JR10158A             | Kenya, Taita Hills        | Yale                   | MW335287                    | JX503766 |
| Clade E | <i>Leptogium</i> | OTU E3             | JR10163A             | Kenya, Taita Hills        | Yale                   | MW335288                    | -        |
| Clade E | <i>Leptogium</i> | OTU E3             | JR10169A             | Kenya, Taita Hills        | Yale                   | MW335289                    | JX503763 |
| Clade E | <i>Leptogium</i> | OTU E3             | JR10170B             | Kenya, Taita Hills        | Yale                   | MW335290                    | JX503758 |
| Clade E | <i>Leptogium</i> | OTU E3             | JR10170C             | Kenya, Taita Hills        | Yale                   | MW335291                    | JX503767 |
| Clade E | <i>Leptogium</i> | OTU E3             | JR10182B             | Kenya, Taita Hills        | Yale                   | MW335292                    | -        |
| Clade E | <i>Leptogium</i> | OTU E3             | JR10260B             | Kenya, Taita Hills        | Mwachora               | -                           | JX503764 |
| Clade E | <i>Leptogium</i> | OTU E3             | JR10283A             | Kenya, Taita Hills        | Macha                  | MW335293                    | JX503759 |
| Clade E | <i>Leptogium</i> | OTU E3             | UK110514c            | Kenya, Taita Hills        | Vuria                  | MW335294                    | -        |
| Clade E | <i>Leptogium</i> | OTU E3             | UK170778e            | Tanzania, Mt. Kilimanjaro | FPo1                   | MW335295                    | MW340313 |
| Clade E | <i>Leptogium</i> | OTU E3             | UK170804e            | Tanzania, Mt. Kilimanjaro | FOc1                   | -                           | MW340314 |
| Clade E | <i>Leptogium</i> | OTU E3             | UK170845r            | Tanzania, Mt. Kilimanjaro | FPD3                   | MW335296                    | MW340315 |
| Clade E | <i>Leptogium</i> | OTU E3             | UK170944a            | Tanzania, Mt. Kilimanjaro | Flm1                   | MW335297                    | MW340316 |
| Clade E | <i>Leptogium</i> | OTU E3             | UK171185m            | Tanzania, Mt. Kilimanjaro | FOD3                   | MW335298                    | MW340317 |
| Clade E | <i>Leptogium</i> | OTU E3             | UK171497a            | Tanzania, Mt. Kilimanjaro | FOD1                   | MW335299                    | MW340318 |
| Clade E | <i>Leptogium</i> | OTU E3             | UK171505e            | Tanzania, Mt. Kilimanjaro | FOD2                   | MW335300                    | MW340319 |
| Clade E | <i>Leptogium</i> | OTU E3             | UK171510p            | Tanzania, Mt. Kilimanjaro | FOD2                   | MW335301                    | MW340320 |
| Clade E | <i>Leptogium</i> | OTU E3             | UK171577r            | Tanzania, Mt. Kilimanjaro | FPD2                   | MW335302                    | MW340321 |
| Clade E | <i>Leptogium</i> | OTU E3             | UK171582h            | Tanzania, Mt. Kilimanjaro | FPD2                   | MW335303                    | MW340322 |
| Clade E | <i>Leptogium</i> | OTU E3             | UK171591a            | Tanzania, Mt. Kilimanjaro | FPo3                   | MW335304                    | MW340323 |
| Clade E | <i>Leptogium</i> | OTU E3             | UK171591e            | Tanzania, Mt. Kilimanjaro | FPo3                   | MW335305                    | MW340324 |

| Clade   |                                   |        | Collection number | Collection locality       | Forest/plot            | NCBI Accession No.<br>mtSSU nuITS |          |
|---------|-----------------------------------|--------|-------------------|---------------------------|------------------------|-----------------------------------|----------|
| Clade F | <i>Leptogium</i>                  | OTU F1 | JR10120C          | Kenya, Taita Hills        | Vuria                  | MW335306                          | JX503839 |
| Clade F | <i>Leptogium</i>                  | OTU F1 | JR10120D          | Kenya, Taita Hills        | Vuria                  | MW335307                          | -        |
| Clade F | <i>Leptogium</i>                  | OTU F1 | JR10170D          | Kenya, Taita Hills        | Yale                   | -                                 | JX503840 |
| Clade F | <i>Leptogium</i>                  | OTU F1 | UK170855b         | Tanzania, Mt. Kilimanjaro | FPo4                   | MW335308                          | MW340325 |
| Clade G | <i>Leptogium</i>                  | OTU G1 | UK170845s         | Tanzania, Mt. Kilimanjaro | FPD3                   | MW335309                          | MW340326 |
| Clade G | <i>Leptogium</i>                  | OTU G1 | UK170858h         | Tanzania, Mt. Kilimanjaro | FPo4                   | MW335310                          | MW340327 |
| Clade G | <i>Leptogium</i>                  | OTU G1 | UK171185o         | Tanzania, Mt. Kilimanjaro | FOD3                   | MW335311                          | MW340328 |
| Clade G | <i>Leptogium</i>                  | OTU G1 | UK171505g         | Tanzania, Mt. Kilimanjaro | FOD2                   | MW335312                          | MW340329 |
| Clade H | <i>Leptogium</i>                  | OTU H1 | JR10017a          | Kenya, Taita Hills        | Taita Research Station | MW335313                          | JX503805 |
| Clade H | <i>Leptogium</i>                  | OTU H1 | UK160418b         | Tanzania, Mt. Kilimanjaro | savanna 1              | MW335314                          | -        |
| Clade H | <i>Leptogium</i>                  | OTU H1 | UK160418d         | Tanzania, Mt. Kilimanjaro | savanna 1              | MW335315                          | -        |
| Clade H | <i>Leptogium</i>                  | OTU H2 | UK170792g         | Tanzania, Mt. Kilimanjaro | FOc2                   | MW335316                          | MW340330 |
| Clade H | <i>Leptogium</i>                  | OTU H2 | UK170821a         | Tanzania, Mt. Kilimanjaro | FPD4                   | MW335317                          | MW340331 |
| Clade H | <i>Leptogium</i>                  | OTU H2 | UK170880n         | Tanzania, Mt. Kilimanjaro | FPo5                   | MW335318                          | MW340332 |
| Clade H | <i>Leptogium</i>                  | OTU H2 | UK170911a         | Tanzania, Mt. Kilimanjaro | FOD5                   | MW335319                          | MW340333 |
| Clade H | <i>Leptogium</i>                  | OTU H2 | UK171340j         | Tanzania, Mt. Kilimanjaro | FED1                   | MW335320                          | MW340334 |
| Clade H | <i>Leptogium</i>                  | OTU H2 | UK171439e         | Tanzania, Mt. Kilimanjaro | FEr2                   | MW335321                          | MW340335 |
| Clade H | <i>Leptogium</i>                  | OTU H2 | UK171478e         | Tanzania, Mt. Kilimanjaro | FOc4                   | MW335322                          | MW340336 |
| Clade H | <i>Leptogium</i>                  | OTU H2 | UK171494b         | Tanzania, Mt. Kilimanjaro | FOc3                   | MW335323                          | MW340337 |
| Clade H | <i>Leptogium</i>                  | OTU H2 | UK171516y         | Tanzania, Mt. Kilimanjaro | FOc5                   | MW335324                          | MW340338 |
| Clade H | <i>Leptogium</i>                  | OTU H2 | UK171525k         | Tanzania, Mt. Kilimanjaro | FPo2                   | MW335325                          | MW340339 |
| Clade H | <i>Leptogium</i>                  | OTU H2 | UK171584c         | Tanzania, Mt. Kilimanjaro | FPD2                   | MW335326                          | MW340340 |
| Clade H | <i>Leptogium</i>                  | OTU H3 | JR10077           | Kenya, Taita Hills        | Vuria                  | MW335327                          | JX503836 |
| Clade H | <i>Leptogium</i>                  | OTU H3 | JR10081A          | Kenya, Taita Hills        | Vuria                  | MW335328                          | JX503838 |
| Clade H | <i>Leptogium</i>                  | OTU H3 | JR10119Bb         | Kenya, Taita Hills        | Vuria                  | MW335329                          | -        |
| Clade H | <i>Leptogium</i>                  | OTU H3 | JR10163B          | Kenya, Taita Hills        | Yale                   | MW335330                          | JX503837 |
| Clade H | <i>Leptogium</i>                  | OTU H3 | UK170927h         | Tanzania, Mt. Kilimanjaro | Flm6                   | MW335331                          | MW340341 |
| Clade H | <i>Leptogium</i>                  | OTU H3 | UK170998c         | Tanzania, Mt. Kilimanjaro | Home 5                 | MW335332                          | MW340342 |
| Clade I | <i>Leptogium austroamericanum</i> |        | JR_W8b            | Kenya, Mt. Kasigau        | Kasigau                | MW335333                          | -        |
| Clade I | <i>Leptogium austroamericanum</i> |        | JR290B            | Kenya, Mt. Kasigau        | Kasigau N-slope        | MW335353                          | -        |
| Clade I | <i>Leptogium austroamericanum</i> |        | JR10K033          | Kenya, Mt. Kasigau        | Kasigau N3             | MW335334                          | MW340343 |
| Clade I | <i>Leptogium austroamericanum</i> |        | JR10K041          | Kenya, Mt. Kasigau        | Kasigau N4             | MW335335                          | MW340344 |
| Clade I | <i>Leptogium austroamericanum</i> |        | JR10K084Aa        | Kenya, Mt. Kasigau        | Kasigau N8             | MW335336                          | MW340345 |
| Clade I | <i>Leptogium austroamericanum</i> |        | JR10K092          | Kenya, Mt. Kasigau        | Kasigau N9             | MW335337                          | MW340346 |
| Clade I | <i>Leptogium austroamericanum</i> |        | JR10K111c         | Kenya, Mt. Kasigau        | Kasigau N11            | MW335338                          | MW340347 |
| Clade I | <i>Leptogium austroamericanum</i> |        | JR10K201          | Kenya, Mt. Kasigau        | Kasigau E5             | MW335339                          | MW340348 |
| Clade I | <i>Leptogium austroamericanum</i> |        | JR10K202          | Kenya, Mt. Kasigau        | Kasigau E5             | MW335340                          | MW340349 |
| Clade I | <i>Leptogium austroamericanum</i> |        | JR10K211Ba        | Kenya, Mt. Kasigau        | Kasigau E6             | MW335341                          | MW340350 |
| Clade I | <i>Leptogium austroamericanum</i> |        | JR10K251C         | Kenya, Mt. Kasigau        | Kasigau 25E            | MW335342                          | -        |
| Clade I | <i>Leptogium austroamericanum</i> |        | JR10K341a         | Kenya, Mt. Kasigau        | Kasigau S2             | MW335343                          | MW340351 |
| Clade I | <i>Leptogium austroamericanum</i> |        | JR10K351          | Kenya, Mt. Kasigau        | Kasigau S3             | MW335344                          | MW340352 |
| Clade I | <i>Leptogium austroamericanum</i> |        | JR10K361          | Kenya, Mt. Kasigau        | Kasigau S4             | MW335345                          | MW340353 |
| Clade I | <i>Leptogium austroamericanum</i> |        | JR10K362          | Kenya, Mt. Kasigau        | Kasigau S4             | MW335346                          | MW340354 |
| Clade I | <i>Leptogium austroamericanum</i> |        | JR10K381          | Kenya, Mt. Kasigau        | Kasigau S6             | MW335347                          | MW340355 |
| Clade I | <i>Leptogium austroamericanum</i> |        | JR10K391          | Kenya, Mt. Kasigau        | Kasigau S7             | MW335348                          | MW340356 |
| Clade I | <i>Leptogium austroamericanum</i> |        | JR10K422          | Kenya, Mt. Kasigau        | Kasigau S10            | MW335349                          | MW340357 |
| Clade I | <i>Leptogium austroamericanum</i> |        | JR10K432          | Kenya, Mt. Kasigau        | Kasigau S11            | MW335350                          | MW340358 |
| Clade I | <i>Leptogium austroamericanum</i> |        | JR10K461          | Kenya, Mt. Kasigau        | Kasigau W2             | MW335351                          | MW340359 |
| Clade I | <i>Leptogium austroamericanum</i> |        | JR10K491A         | Kenya, Mt. Kasigau        | Kasigau W5             | MW335352                          | MW340360 |
| Clade J | <i>Leptogium</i>                  | OTU J1 | JR_AT1            | Kenya, Taita Hills        | Ngangao                | MW335354                          | JX503834 |
| Clade J | <i>Leptogium</i>                  | OTU J1 | JR_AT2A           | Kenya, Taita Hills        | Ngangao                | MW335355                          | JX503835 |
| Clade J | <i>Leptogium</i>                  | OTU J1 | JR_D12_B1         | Kenya, Taita Hills        | Ngangao                | -                                 | JX503824 |
| Clade J | <i>Leptogium</i>                  | OTU J1 | JR_X1             | Kenya, Taita Hills        | Chawia                 | MW335356                          | JX503823 |
| Clade J | <i>Leptogium</i>                  | OTU J1 | JR10012A          | Kenya, Taita Hills        | Taita Research Station | MW335357                          | -        |
| Clade J | <i>Leptogium</i>                  | OTU J1 | JR10036           | Kenya, Taita Hills        | Shomoto Hill           | MW335358                          | -        |
| Clade J | <i>Leptogium</i>                  | OTU J1 | JR10097A          | Kenya, Taita Hills        | Vuria                  | MW335359                          | -        |
| Clade J | <i>Leptogium</i>                  | OTU J1 | JR10097B          | Kenya, Taita Hills        | Vuria                  | MW335360                          | JX503822 |
| Clade J | <i>Leptogium</i>                  | OTU J1 | JR10128B          | Kenya, Taita Hills        | Vuria                  | MW335361                          | JX503826 |
| Clade J | <i>Leptogium</i>                  | OTU J1 | JR10146           | Kenya, Taita Hills        | Ngangao                | MW335362                          | JX503832 |
| Clade J | <i>Leptogium</i>                  | OTU J1 | JR10186A          | Kenya, Taita Hills        | Yale                   | MW335363                          | JX503825 |

| Clade   |                            |        | Collection<br>number | Collection locality       | Forest/plot     | NCBI Accession No.<br>mtSSU | nuITS    |
|---------|----------------------------|--------|----------------------|---------------------------|-----------------|-----------------------------|----------|
| Clade J | <i>Leptogium</i>           | OTU J1 | JR10186C             | Kenya, Taita Hills        | Yale            | -                           | JX503827 |
| Clade J | <i>Leptogium</i>           | OTU J1 | JR10232B             | Kenya, Taita Hills        | Mwachora        | MW335364                    | JX503830 |
| Clade J | <i>Leptogium</i>           | OTU J1 | JR10K032             | Kenya, Mt. Kasigau        | Kasigau N3      | MW335365                    | MW340361 |
| Clade J | <i>Leptogium</i>           | OTU J1 | JR10K251B            | Kenya, Mt. Kasigau        | Kasigau E10     | MW335366                    | MW340362 |
| Clade J | <i>Leptogium</i>           | OTU J1 | JR10K258             | Kenya, Mt. Kasigau        | Kasigau 25-26 E | MW335367                    | -        |
| Clade J | <i>Leptogium</i>           | OTU J1 | JR10K261a            | Kenya, Mt. Kasigau        | Kasigau E11     | MW335368                    | MW340363 |
| Clade J | <i>Leptogium</i>           | OTU J1 | JR10K261b            | Kenya, Mt. Kasigau        | Kasigau E11     | MW335369                    | MW340364 |
| Clade J | <i>Leptogium</i>           | OTU J1 | JR10K481             | Kenya, Mt. Kasigau        | Kasigau 48W     | MW335370                    | MW340365 |
| Clade J | <i>Leptogium</i>           | OTU J1 | JR10K491B            | Kenya, Mt. Kasigau        | Kasigau 49W     | MW335371                    | MW340366 |
| Clade J | <i>Leptogium</i>           | OTU J1 | JR10K491C            | Kenya, Mt. Kasigau        | Kasigau 49W     | MW335372                    | MW340367 |
| Clade J | <i>Leptogium</i>           | OTU J1 | JR10K492b            | Kenya, Mt. Kasigau        | Kasigau 49W     | MW335373                    | MW340368 |
| Clade J | <i>Leptogium</i>           | OTU J1 | JR10K551A            | Kenya, Mt. Kasigau        | Kasigau 55W     | MW335374                    | MW340369 |
| Clade J | <i>Leptogium</i>           | OTU J1 | JR10K551B            | Kenya, Mt. Kasigau        | Kasigau 55W     | MW335375                    | MW340370 |
| Clade J | <i>Leptogium</i>           | OTU J1 | JR10K581A            | Kenya, Mt. Kasigau        | Kasigau 58W     | MW335376                    | MW340371 |
| Clade J | <i>Leptogium</i>           | OTU J1 | JR10K581B            | Kenya, Mt. Kasigau        | Kasigau 58W     | MW335377                    | MW340372 |
| Clade J | <i>Leptogium</i>           | OTU J1 | JR11006A             | Kenya, Taita Hills        | Vuria           | MW335378                    | JX503833 |
| Clade J | <i>Leptogium</i>           | OTU J1 | JR11009A             | Kenya, Taita Hills        | Vuria           | MW335379                    | JX503829 |
| Clade J | <i>Leptogium</i>           | OTU J1 | JR11010Aa            | Kenya, Taita Hills        | Vuria           | MW335380                    | JX503821 |
| Clade J | <i>Leptogium</i>           | OTU J1 | UK110521             | Kenya, Taita Hills        | Vuria           | MW335381                    | JX503828 |
| Clade J | <i>Leptogium</i>           | OTU J1 | UK170804c            | Tanzania, Mt. Kilimanjaro | FOc1            | MW335382                    | MW340373 |
| Clade J | <i>Leptogium</i>           | OTU J1 | UK170917a            | Tanzania, Mt. Kilimanjaro | Flm6            | MW335383                    | MW340374 |
| Clade J | <i>Leptogium</i>           | OTU J1 | UK170920b            | Tanzania, Mt. Kilimanjaro | Flm6            | MW335384                    | MW340375 |
| Clade J | <i>Leptogium</i>           | OTU J1 | UK170929e            | Tanzania, Mt. Kilimanjaro | Flm6            | MW335385                    | MW340376 |
| Clade J | <i>Leptogium</i>           | OTU J1 | UK170950f            | Tanzania, Mt. Kilimanjaro | Flm1            | MW335386                    | MW340377 |
| Clade J | <i>Leptogium</i>           | OTU J1 | UK170951e            | Tanzania, Mt. Kilimanjaro | Flm1            | MW335387                    | MW340378 |
| Clade J | <i>Leptogium</i>           | OTU J1 | UK171201a            | Tanzania, Mt. Kilimanjaro | Flm3            | MW335388                    | MW340379 |
| Clade J | <i>Leptogium</i>           | OTU J1 | UK171204b            | Tanzania, Mt. Kilimanjaro | Flm3            | MW335389                    | MW340380 |
| Clade J | <i>Leptogium</i>           | OTU J1 | UK171204c            | Tanzania, Mt. Kilimanjaro | Flm3            | MW335390                    | MW340381 |
| Clade J | <i>Leptogium</i>           | OTU J1 | UK171483j            | Tanzania, Mt. Kilimanjaro | FOc4            | MW335391                    | MW340382 |
| Clade J | <i>Leptogium</i>           | OTU J1 | UK171498c            | Tanzania, Mt. Kilimanjaro | FOD1            | MW335392                    | MW340383 |
| Clade J | <i>Leptogium</i>           | OTU J1 | UK171502a            | Tanzania, Mt. Kilimanjaro | FOD1            | MW335393                    | MW340384 |
| Clade J | <i>Leptogium</i>           | OTU J1 | UK171590p            | Tanzania, Mt. Kilimanjaro | FPo3            | MW335394                    | MW340385 |
| Clade J | <i>Leptogium</i>           | OTU J1 | UK171593             | Tanzania, Mt. Kilimanjaro | Flm2            | MW335395                    | MW340386 |
| Clade J | <i>Leptogium</i>           | OTU J1 | UK171596g            | Tanzania, Mt. Kilimanjaro | Flm2            | MW335396                    | MW340387 |
| Clade K | <i>Leptogium javanicum</i> |        | JR10110A             | Kenya, Taita Hills        | Vuria           | -                           | JX503864 |
| Clade K | <i>Leptogium javanicum</i> |        | JR10113A             | Kenya, Taita Hills        | Vuria           | -                           | JX503866 |
| Clade K | <i>Leptogium javanicum</i> |        | JR10113B             | Kenya, Taita Hills        | Vuria           | MW335397                    | -        |
| Clade K | <i>Leptogium javanicum</i> |        | JR10113C             | Kenya, Taita Hills        | Vuria           | MW335398                    | -        |
| Clade K | <i>Leptogium javanicum</i> |        | JR10115A             | Kenya, Taita Hills        | Vuria           | -                           | JX503865 |
| Clade K | <i>Leptogium javanicum</i> |        | JR10119B             | Kenya, Taita Hills        | Vuria           | MW335399                    | JX503867 |
| Clade K | <i>Leptogium javanicum</i> |        | JR10131A             | Kenya, Taita Hills        | Vuria           | MW335400                    | JX503863 |
| Clade K | <i>Leptogium javanicum</i> |        | JR10131B             | Kenya, Taita Hills        | Vuria           | -                           | JX503862 |
| Clade K | <i>Leptogium</i>           | sp.    | JR10251C             | Kenya, Taita Hills        | Mwachora        | MW335401                    | JX503846 |
| Clade K | <i>Leptogium</i>           | OTU K1 | JR_W8a               | Kenya, Mt. Kasigau        | Kasigau         | MW335402                    | JX503841 |
| Clade K | <i>Leptogium</i>           | OTU K1 | JR10K423b            | Kenya, Mt. Kasigau        | Kasigau S10-11  | MW335403                    | MW340388 |
| Clade K | <i>Leptogium</i>           | OTU K1 | UK171189b            | Tanzania, Mt. Kilimanjaro | Flm4            | MW335404                    | MW340389 |
| Clade K | <i>Leptogium</i>           | OTU K1 | UK171198a            | Tanzania, Mt. Kilimanjaro | Flm4            | MW335405                    | MW340390 |
| Clade K | <i>Leptogium</i>           | OTU K2 | JR10K533             | Kenya, Mt. Kasigau        | Kasigau W9-10   | MW335406                    | MW340391 |
| Clade K | <i>Leptogium</i>           | OTU K2 | JR10K561             | Kenya, Mt. Kasigau        | Kasigau W12     | MW335407                    | MW340392 |
| Clade K | <i>Leptogium</i>           | OTU K3 | JR_Y15               | Kenya, Taita Hills        | Ngangao         | -                           | JX503845 |
| Clade K | <i>Leptogium</i>           | OTU K3 | JR10094              | Kenya, Taita Hills        | Vuria           | MW335408                    | -        |
| Clade K | <i>Leptogium</i>           | OTU K3 | JR10096              | Kenya, Taita Hills        | Vuria           | MW335409                    | JX503844 |
| Clade K | <i>Leptogium</i>           | OTU K3 | JR10098A             | Kenya, Taita Hills        | Vuria           | MW335410                    | JX503842 |
| Clade K | <i>Leptogium</i>           | OTU K3 | JR10098B             | Kenya, Taita Hills        | Vuria           | -                           | JX503843 |
| Clade K | <i>Leptogium</i>           | OTU K3 | JR10K511             | Kenya, Mt. Kasigau        | Kasigau W7      | MW335411                    | MW340393 |
| Clade K | <i>Leptogium</i>           | OTU K3 | UK110530b            | Kenya, Taita Hills        | Vuria           | MW335412                    | -        |
| Clade K | <i>Leptogium</i>           | OTU K3 | UK170897d            | Tanzania, Mt. Kilimanjaro | FOD4            | MW335413                    | MW340394 |
| Clade K | <i>Leptogium</i>           | OTU K3 | UK170897e            | Tanzania, Mt. Kilimanjaro | FOD4            | MW335414                    | MW340395 |
| Clade K | <i>Leptogium</i>           | OTU K3 | UK170900b            | Tanzania, Mt. Kilimanjaro | FOD4            | MW335415                    | MW340396 |
| Clade K | <i>Leptogium</i>           | OTU K3 | UK170909c            | Tanzania, Mt. Kilimanjaro | FOD5            | MW335416                    | MW340397 |

|         |                  |         | Collection<br>number | Collection locality       | Forest/plot            | NCBI Accession No. |          |
|---------|------------------|---------|----------------------|---------------------------|------------------------|--------------------|----------|
| Clade   |                  |         |                      |                           |                        | mtSSU              | nuITS    |
| Clade K | <i>Leptogium</i> | OTU K3  | UK170912f            | Tanzania, Mt. Kilimanjaro | FOD5                   | MW335417           | MW340398 |
| Clade K | <i>Leptogium</i> | OTU K3  | UK170914a            | Tanzania, Mt. Kilimanjaro | FOD5                   | MW335418           | MW340399 |
| Clade K | <i>Leptogium</i> | OTU K3  | UK170920a            | Tanzania, Mt. Kilimanjaro | Flm6                   | MW335419           | MW340400 |
| Clade K | <i>Leptogium</i> | OTU K3  | UK170921a            | Tanzania, Mt. Kilimanjaro | Flm6                   | MW335420           | MW340401 |
| Clade K | <i>Leptogium</i> | OTU K3  | UK170925a            | Tanzania, Mt. Kilimanjaro | Flm6                   | MW335421           | MW340402 |
| Clade K | <i>Leptogium</i> | OTU K3  | UK170935r            | Tanzania, Mt. Kilimanjaro | Flm1                   | MW335422           | MW340403 |
| Clade K | <i>Leptogium</i> | OTU K3  | UK171483k            | Tanzania, Mt. Kilimanjaro | FOc4                   | MW335423           | MW340404 |
| Clade K | <i>Leptogium</i> | OTU K3  | UK171483m            | Tanzania, Mt. Kilimanjaro | FOc4                   | MW335424           | MW340405 |
| Clade K | <i>Leptogium</i> | OTU K3  | UK171497b            | Tanzania, Mt. Kilimanjaro | FOD1                   | MW335425           | MW340406 |
| Clade K | <i>Leptogium</i> | OTU K3  | UK171597b            | Tanzania, Mt. Kilimanjaro | Flm2                   | MW335426           | MW340407 |
| Clade K | <i>Leptogium</i> | OTU K4  | JR10158C             | Kenya, Taita Hills        | Yale                   | MW335427           | JX503847 |
| Clade K | <i>Leptogium</i> | OTU K4  | JR10177C             | Kenya, Taita Hills        | Yale                   | MW335428           | JX503848 |
| Clade K | <i>Leptogium</i> | OTU K4  | JR10259B             | Kenya, Taita Hills        | Mwachora               | MW335429           | JX503849 |
| Clade K | <i>Leptogium</i> | OTU K4  | JR10259C             | Kenya, Taita Hills        | Mwachora               | MW335430           | -        |
| Clade K | <i>Leptogium</i> | OTU K4  | UK110564             | Kenya, Taita Hills        | Chawia                 | MW335431           | -        |
| Clade K | <i>Leptogium</i> | OTU K5  | JR11007B             | Kenya, Taita Hills        | Vuria                  | MW335432           | -        |
| Clade K | <i>Leptogium</i> | OTU K5  | JR10030A             | Kenya, Taita Hills        | Shomoto Hill           | MW335434           | JX503853 |
| Clade K | <i>Leptogium</i> | OTU K5  | JR10033A             | Kenya, Taita Hills        | Shomoto Hill           | MW335435           | JX503854 |
| Clade K | <i>Leptogium</i> | OTU K5  | JR10239A             | Kenya, Taita Hills        | Mwachora               | -                  | JX503852 |
| Clade K | <i>Leptogium</i> | OTU K5  | JR10251A             | Kenya, Taita Hills        | Mwachora               | MW335436           | JX503856 |
| Clade K | <i>Leptogium</i> | OTU K5  | JR10K111b            | Kenya, Mt. Kasigau        | Kasigau N11            | MW335437           | MW340408 |
| Clade K | <i>Leptogium</i> | OTU K5  | JR11026              | Kenya, Taita Hills        | Vuria                  | MW335438           | JX503858 |
| Clade K | <i>Leptogium</i> | OTU K5  | JR11002A             | Kenya, Taita Hills        | Werugha                | -                  | JX503857 |
| Clade K | <i>Leptogium</i> | OTU K5  | JR10016F             | Kenya, Taita Hills        | Vuria                  | MW335433           | -        |
| Clade K | <i>Leptogium</i> | OTU K5  | JR11054D             | Kenya, Taita Hills        | Vuria                  | -                  | JX503855 |
| Clade K | <i>Leptogium</i> | OTU K5  | JR11060              | Kenya, Taita Hills        | Fururu                 | -                  | JX503851 |
| Clade K | <i>Leptogium</i> | OTU K5  | UK110513             | Kenya, Taita Hills        | Vuria                  | MW335439           | JX503859 |
| Clade K | <i>Leptogium</i> | OTU K6  | JR_X7A               | Kenya, Taita Hills        | Chawia                 | MW335440           | JX503850 |
| Clade K | <i>Leptogium</i> | OTU K6  | JR10K272             | Kenya, Mt. Kasigau        | Kasigau E12            | MW335441           | MW340409 |
| Clade K | <i>Leptogium</i> | OTU K7  | JR10110B             | Kenya, Taita Hills        | Vuria                  | MW335442           | -        |
| Clade K | <i>Leptogium</i> | OTU K7  | JR10125              | Kenya, Taita Hills        | Vuria                  | MW335443           | JX503861 |
| Clade K | <i>Leptogium</i> | OTU K8  | JR10145A             | Kenya, Taita Hills        | Ngangao                | MW335444           | JX503860 |
| Clade K | <i>Leptogium</i> | OTU K8  | JR10145C             | Kenya, Taita Hills        | Ngangao                | MW335445           | -        |
| Clade K | <i>Leptogium</i> | OTU K8  | UK170951d            | Tanzania, Mt. Kilimanjaro | Flm1                   | MW335446           | MW340410 |
| Clade K | <i>Leptogium</i> | OTU K8  | UK171596h            | Tanzania, Mt. Kilimanjaro | Flm2                   | MW335447           | MW340411 |
| Clade K | <i>Leptogium</i> | OTU K9  | JR10K031             | Kenya, Mt. Kasigau        | Kasigau N3             | MW335448           | MW340412 |
| Clade K | <i>Leptogium</i> | OTU K9  | JR10K181a            | Kenya, Mt. Kasigau        | Kasigau E3             | MW335449           | MW340413 |
| Clade K | <i>Leptogium</i> | OTU K9  | JR10K182             | Kenya, Mt. Kasigau        | Kasigau E3             | MW335450           | MW340414 |
| Clade K | <i>Leptogium</i> | OTU K9  | JR10K371             | Kenya, Mt. Kasigau        | Kasigau S5             | MW335451           | MW340415 |
| Clade K | <i>Leptogium</i> | OTU K9  | JR10K392B2           | Kenya, Mt. Kasigau        | Kasigau S7             | MW335477           | MW340416 |
| Clade K | <i>Leptogium</i> | OTU K9  | JR10K451b            | Kenya, Mt. Kasigau        | Kasigau W1             | MW335453           | MW340417 |
| Clade K | <i>Leptogium</i> | OTU K9  | JR10K452b            | Kenya, Mt. Kasigau        | Kasigau W1             | MW335454           | MW340418 |
| Clade K | <i>Leptogium</i> | OTU K10 | JR10021              | Kenya, Taita Hills        | Taita Research Station | MW335455           | -        |
| Clade K | <i>Leptogium</i> | OTU K10 | JR10022C             | Kenya, Taita Hills        | Taita Research Station | -                  | JX503869 |
| Clade K | <i>Leptogium</i> | OTU K10 | JR10063B             | Kenya, Taita Hills        | Shomoto Hill           | MW335456           | -        |
| Clade K | <i>Leptogium</i> | OTU K10 | JR10063C             | Kenya, Taita Hills        | Shomoto Hill           | MW335457           | -        |
| Clade K | <i>Leptogium</i> | OTU K10 | JR10110C             | Kenya, Taita Hills        | Vuria                  | -                  | JX503871 |
| Clade K | <i>Leptogium</i> | OTU K10 | JR10128A             | Kenya, Taita Hills        | Vuria                  | -                  | JX503872 |
| Clade K | <i>Leptogium</i> | OTU K10 | JR10149B             | Kenya, Taita Hills        | Yale                   | MW335458           | JX503881 |
| Clade K | <i>Leptogium</i> | OTU K10 | JR10153A             | Kenya, Taita Hills        | Yale                   | MW335459           | JX503882 |
| Clade K | <i>Leptogium</i> | OTU K10 | JR10169C             | Kenya, Taita Hills        | Yale                   | MW335460           | JX503868 |
| Clade K | <i>Leptogium</i> | OTU K10 | JR10174A             | Kenya, Taita Hills        | Yale                   | MW335461           | -        |
| Clade K | <i>Leptogium</i> | OTU K10 | JR10174B             | Kenya, Taita Hills        | Yale                   | MW335462           | -        |
| Clade K | <i>Leptogium</i> | OTU K10 | JR10174C             | Kenya, Taita Hills        | Yale                   | MW335463           | -        |
| Clade K | <i>Leptogium</i> | OTU K10 | JR10178B             | Kenya, Taita Hills        | Yale                   | -                  | JX503873 |
| Clade K | <i>Leptogium</i> | OTU K10 | JR10185A             | Kenya, Taita Hills        | Yale                   | MW335464           | JX503883 |
| Clade K | <i>Leptogium</i> | OTU K10 | JR10197              | Kenya, Taita Hills        | Yale                   | MW335465           | JX503870 |
| Clade K | <i>Leptogium</i> | OTU K10 | JR10199B             | Kenya, Taita Hills        | Yale                   | MW335466           | JX503877 |
| Clade K | <i>Leptogium</i> | OTU K10 | JR10221A             | Kenya, Taita Hills        | Mwachora               | -                  | JX503874 |
| Clade K | <i>Leptogium</i> | OTU K10 | JR10221B             | Kenya, Taita Hills        | Mwachora               | MW335467           | JX503875 |

| Clade   |                  |         | Collection<br>number | Collection locality       | Forest/plot   | NCBI Accession No.<br>mtSSU | nuITS    |
|---------|------------------|---------|----------------------|---------------------------|---------------|-----------------------------|----------|
| Clade K | <i>Leptogium</i> | OTU K10 | JR10235A             | Kenya, Taita Hills        | Mwachora      | MW335468                    | -        |
| Clade K | <i>Leptogium</i> | OTU K10 | JR10269A             | Kenya, Taita Hills        | Mwachora      | -                           | JX503879 |
| Clade K | <i>Leptogium</i> | OTU K10 | JR10269B             | Kenya, Taita Hills        | Mwachora      | -                           | JX503880 |
| Clade K | <i>Leptogium</i> | OTU K10 | JR10283C             | Kenya, Taita Hills        | Macha         | MW335469                    | JX503878 |
| Clade K | <i>Leptogium</i> | OTU K10 | JR10K063             | Kenya, Mt. Kasigau        | Kasigau N6    | MW335470                    | MW340419 |
| Clade K | <i>Leptogium</i> | OTU K10 | JR10K071a            | Kenya, Mt. Kasigau        | Kasigau N7    | MW335471                    | MW340420 |
| Clade K | <i>Leptogium</i> | OTU K10 | JR10K121a            | Kenya, Mt. Kasigau        | Kasigau N12   | MW335472                    | MW340421 |
| Clade K | <i>Leptogium</i> | OTU K10 | JR10K211A1           | Kenya, Mt. Kasigau        | Kasigau E6    | MW335473                    | MW340422 |
| Clade K | <i>Leptogium</i> | OTU K10 | JR10K211Bb           | Kenya, Mt. Kasigau        | Kasigau E6    | MW335474                    | MW340423 |
| Clade K | <i>Leptogium</i> | OTU K10 | JR10K242             | Kenya, Mt. Kasigau        | Kasigau E9    | MW335475                    | MW340424 |
| Clade K | <i>Leptogium</i> | OTU K10 | JR10K245             | Kenya, Mt. Kasigau        | Kasigau E9-10 | MW335476                    | MW340425 |
| Clade K | <i>Leptogium</i> | OTU K10 | JR10K392B            | Kenya, Mt. Kasigau        | Kasigau S7    | MW335452                    | MW340426 |
| Clade K | <i>Leptogium</i> | OTU K10 | JR10K471             | Kenya, Mt. Kasigau        | Kasigau W3    | MW335478                    | MW340427 |
| Clade K | <i>Leptogium</i> | OTU K10 | JR10K531B            | Kenya, Mt. Kasigau        | Kasigau W9    | MW335479                    | MW340428 |
| Clade K | <i>Leptogium</i> | OTU K10 | JR11078A             | Kenya, Taita Hills        | Chawia        | MW335480                    | JX503876 |
| Clade K | <i>Leptogium</i> | OTU K11 | JR10040B             | Kenya, Taita Hills        | Shomoto Hill  | -                           | JX503884 |
| Clade K | <i>Leptogium</i> | OTU K11 | JR10040C             | Kenya, Taita Hills        | Shomoto Hill  | MW335481                    | -        |
| Clade K | <i>Leptogium</i> | OTU K11 | JR10239C             | Kenya, Taita Hills        | Mwachora      | MW335482                    | JX503885 |
| Clade K | <i>Leptogium</i> | OTU K11 | UK160548a            | Tanzania, Mt. Kilimanjaro | Home 3        | MW335483                    | MW340429 |
| Clade K | <i>Leptogium</i> | OTU K11 | UK170917b            | Tanzania, Mt. Kilimanjaro | Flm6          | MW335484                    | MW340430 |
| Clade K | <i>Leptogium</i> | OTU K12 | JR_Ar1               | Kenya, Taita Hills        | Ngangao       | -                           | JX503889 |
| Clade K | <i>Leptogium</i> | OTU K12 | UK110511             | Kenya, Taita Hills        | Vuria         | MW335485                    | JX503888 |
| Clade K | <i>Leptogium</i> | OTU K12 | UK110511b            | Kenya, Taita Hills        | Vuria         | MW335486                    | -        |
| Clade K | <i>Leptogium</i> | OTU K13 | JR10218A             | Kenya, Taita Hills        | Yale          | -                           | JX503886 |
| Clade K | <i>Leptogium</i> | OTU K13 | JR10218B             | Kenya, Taita Hills        | Yale          | MW335487                    | JX503887 |
| Clade K | <i>Leptogium</i> | OTU K13 | UK170948d            | Tanzania, Mt. Kilimanjaro | Flm1          | MW335488                    | MW340431 |
| Clade K | <i>Leptogium</i> | OTU K14 | JR_D12_B2            | Kenya, Taita Hills        | Ngangao       | -                           | JX503894 |
| Clade K | <i>Leptogium</i> | OTU K14 | JR_Z7B               | Kenya, Taita Hills        | Ngangao       | -                           | JX503893 |
| Clade K | <i>Leptogium</i> | OTU K14 | JR10114A             | Kenya, Taita Hills        | Vuria         | -                           | JX503891 |
| Clade K | <i>Leptogium</i> | OTU K14 | JR10134A             | Kenya, Taita Hills        | Ngangao       | -                           | JX503890 |
| Clade K | <i>Leptogium</i> | OTU K14 | JR10136A             | Kenya, Taita Hills        | Ngangao       | MW335489                    | JX503896 |
| Clade K | <i>Leptogium</i> | OTU K14 | JR10136B             | Kenya, Taita Hills        | Ngangao       | -                           | JX503898 |
| Clade K | <i>Leptogium</i> | OTU K14 | JR10163Ab            | Kenya, Taita Hills        | Yale          | MW335490                    | -        |
| Clade K | <i>Leptogium</i> | OTU K14 | JR10210B             | Kenya, Taita Hills        | Yale          | MW335491                    | JX503892 |
| Clade K | <i>Leptogium</i> | OTU K14 | UK110505B            | Kenya, Taita Hills        | Ngangao       | MW335492                    | JX503897 |
| Clade K | <i>Leptogium</i> | OTU K14 | UK110507             | Kenya, Taita Hills        | Ngangao       | MW335493                    | JX503895 |
| Clade L | <i>Leptogium</i> | OTU L1  | UK170806g            | Tanzania, Mt. Kilimanjaro | FPD4          | MW335494                    | MW340432 |
| Clade L | <i>Leptogium</i> | OTU L1  | UK171320k            | Tanzania, Mt. Kilimanjaro | FED1          | MW335495                    | MW340433 |
| Clade L | <i>Leptogium</i> | OTU L1  | UK171468n            | Tanzania, Mt. Kilimanjaro | FPD1          | MW335496                    | MW340434 |
| Clade L | <i>Leptogium</i> | OTU L1  | UK171527e            | Tanzania, Mt. Kilimanjaro | FPo2          | MW335497                    | MW340435 |
| Clade L | <i>Leptogium</i> | OTU L1  | UK171585d            | Tanzania, Mt. Kilimanjaro | FPo3          | MW335498                    | MW340436 |
| Clade L | <i>Leptogium</i> | OTU L2  | JR10099              | Kenya, Taita Hills        | Vuria         | MW335499                    | JX503781 |
| Clade L | <i>Leptogium</i> | OTU L2  | JR10161              | Kenya, Taita Hills        | Yale          | MW335500                    | JX503782 |
| Clade L | <i>Leptogium</i> | OTU L2  | JR11087              | Kenya, Taita Hills        | Chawia        | MW335501                    | JX503783 |
| Clade L | <i>Leptogium</i> | OTU L2  | UK170787e            | Tanzania, Mt. Kilimanjaro | FOc2          | MW335502                    | MW340437 |
| Clade L | <i>Leptogium</i> | OTU L2  | UK170801g            | Tanzania, Mt. Kilimanjaro | FOc1          | MW335503                    | MW340438 |
| Clade L | <i>Leptogium</i> | OTU L2  | UK170833f            | Tanzania, Mt. Kilimanjaro | FPD4          | MW335504                    | MW340439 |
| Clade L | <i>Leptogium</i> | OTU L2  | UK170845q            | Tanzania, Mt. Kilimanjaro | FPD3          | MW335505                    | MW340440 |
| Clade L | <i>Leptogium</i> | OTU L2  | UK170900e            | Tanzania, Mt. Kilimanjaro | FOD4          | MW335506                    | MW340441 |
| Clade L | <i>Leptogium</i> | OTU L2  | UK171494c            | Tanzania, Mt. Kilimanjaro | FOc3          | MW335507                    | -        |
| Clade L | <i>Leptogium</i> | OTU L2  | UK171507h            | Tanzania, Mt. Kilimanjaro | FOD2          | MW335508                    | MW340442 |
| Clade L | <i>Leptogium</i> | OTU L2  | UK171510n            | Tanzania, Mt. Kilimanjaro | FOD2          | MW335509                    | MW340443 |
| Clade L | <i>Leptogium</i> | OTU L3  | JR10152A             | Kenya, Taita Hills        | Yale          | MW335510                    | JX503777 |
| Clade L | <i>Leptogium</i> | OTU L3  | JR10152B             | Kenya, Taita Hills        | Yale          | MW335511                    | -        |
| Clade L | <i>Leptogium</i> | OTU L3  | JR10182A             | Kenya, Taita Hills        | Yale          | MW335512                    | JX503776 |
| Clade L | <i>Leptogium</i> | OTU L3  | JR110094x            | Kenya, Taita Hills        | Chawia        | MW335513                    | -        |
| Clade L | <i>Leptogium</i> | OTU L3  | JR11094B             | Kenya, Taita Hills        | Chawia        | -                           | JX503775 |
| Clade L | <i>Leptogium</i> | OTU L3  | UK170804d            | Tanzania, Mt. Kilimanjaro | FOc1          | MW335514                    | MW340444 |
| Clade L | <i>Leptogium</i> | OTU L3  | UK170916am           | Tanzania, Mt. Kilimanjaro | Flm6          | MW335515                    | MW340445 |
| Clade L | <i>Leptogium</i> | OTU L3  | UK170933c            | Tanzania, Mt. Kilimanjaro | Flm1          | MW335516                    | MW340446 |

| Clade   |                  |        | Collection<br>number | Collection locality       | Forest/plot            | NCBI Accession No.<br>mtSSU | nuITS    |
|---------|------------------|--------|----------------------|---------------------------|------------------------|-----------------------------|----------|
| Clade L | <i>Leptogium</i> | OTU L3 | UK170940a            | Tanzania, Mt. Kilimanjaro | Flm1                   | MW335517                    | -        |
| Clade L | <i>Leptogium</i> | OTU L3 | UK171528c            | Tanzania, Mt. Kilimanjaro | FPo2                   | MW335518                    | MW340447 |
| Clade L | <i>Leptogium</i> | OTU L4 | JR10K084Ab           | Kenya, Mt. Kasigau        | Kasigau N8-9           | MW335519                    | MW340448 |
| Clade L | <i>Leptogium</i> | OTU L4 | JR10K084B            | Kenya, Mt. Kasigau        | Kasigau N8-9           | MW335520                    | MW340449 |
| Clade L | <i>Leptogium</i> | OTU L4 | JR10K111a            | Kenya, Mt. Kasigau        | Kasigau N11            | MW335521                    | MW340450 |
| Clade L | <i>Leptogium</i> | OTU L4 | JR290A               | Kenya, Mt. Kasigau        | Kasigau N-slope        | MW335522                    | -        |
| Clade L | <i>Leptogium</i> | OTU L4 | JR290C               | Kenya, Mt. Kasigau        | Kasigau N-slope        | MW335523                    | -        |
| Clade L | <i>Leptogium</i> | OTU L5 | UK160479f            | Tanzania, Mt. Kilimanjaro | home 1                 | MW335524                    | -        |
| Clade L | <i>Leptogium</i> | OTU L5 | UK160552g            | Tanzania, Mt. Kilimanjaro | home 3                 | MW335525                    | -        |
| Clade L | <i>Leptogium</i> | OTU L5 | UK170794k            | Tanzania, Mt. Kilimanjaro | FOc2                   | MW335526                    | MW340451 |
| Clade L | <i>Leptogium</i> | OTU L6 | JR10149A             | Kenya, Taita Hills        | Yale                   | MW335527                    | JX503780 |
| Clade L | <i>Leptogium</i> | OTU L6 | JR10163C             | Kenya, Taita Hills        | Yale                   | MW335528                    | -        |
| Clade L | <i>Leptogium</i> | OTU L6 | JR10178A             | Kenya, Taita Hills        | Yale                   | MW335529                    | JX503779 |
| Clade L | <i>Leptogium</i> | OTU L6 | JR10279A             | Kenya, Taita Hills        | Macha                  | MW335530                    | JX503778 |
| Clade L | <i>Leptogium</i> | OTU L6 | JR10279B             | Kenya, Taita Hills        | Macha                  | MW335531                    | JX503778 |
| Clade L | <i>Leptogium</i> | OTU L7 | UK170852b            | Tanzania, Mt. Kilimanjaro | FPo4                   | MW335532                    | MW340452 |
| Clade L | <i>Leptogium</i> | OTU L7 | UK170907x            | Tanzania, Mt. Kilimanjaro | FOD5                   | MW335533                    | MW340453 |
| Clade L | <i>Leptogium</i> | OTU L7 | UK171185k            | Tanzania, Mt. Kilimanjaro | FOD3                   | MW335534                    | MW340454 |
| Clade L | <i>Leptogium</i> | OTU L7 | UK171473h            | Tanzania, Mt. Kilimanjaro | FPD1                   | MW335535                    | MW340455 |
| Clade L | <i>Leptogium</i> | OTU L7 | UK171478d            | Tanzania, Mt. Kilimanjaro | FOc4                   | MW335536                    | MW340456 |
| Clade L | <i>Leptogium</i> | OTU L7 | UK171486k            | Tanzania, Mt. Kilimanjaro | FOc4                   | MW335537                    | MW340457 |
| Clade L | <i>Leptogium</i> | OTU L7 | UK171514h            | Tanzania, Mt. Kilimanjaro | FOc5                   | MW335538                    | MW340458 |
| Clade L | <i>Leptogium</i> | OTU L7 | UK171524c            | Tanzania, Mt. Kilimanjaro | FPo2                   | MW335539                    | MW340459 |
| Clade L | <i>Leptogium</i> | OTU L7 | UK171587e            | Tanzania, Mt. Kilimanjaro | FPo3                   | MW335540                    | MW340460 |
| Clade L | <i>Leptogium</i> | OTU L7 | UK171587f            | Tanzania, Mt. Kilimanjaro | FPo3                   | MW335541                    | MW340461 |
| Clade L | <i>Leptogium</i> | OTU L7 | UK171591f            | Tanzania, Mt. Kilimanjaro | FPo3                   | MW335542                    | MW340462 |
| Clade M | <i>Leptogium</i> | OTU M1 | JR10K101             | Kenya, Mt. Kasigau        | Kasigau N10            | MW335543                    | MW340463 |
| Clade M | <i>Leptogium</i> | OTU M1 | JR10K241             | Kenya, Mt. Kasigau        | Kasigau E9             | MW335544                    | MW340464 |
| Clade M | <i>Leptogium</i> | OTU M1 | JR10K451a            | Kenya, Mt. Kasigau        | Kasigau W1             | MW335545                    | MW340465 |
| Clade M | <i>Leptogium</i> | OTU M1 | JR10K452a            | Kenya, Mt. Kasigau        | Kasigau W1             | MW335546                    | MW340466 |
| Clade M | <i>Leptogium</i> | OTU M1 | JR10K479             | Kenya, Mt. Kasigau        | Kasigau W3-5           | MW335547                    | MW340467 |
| Clade M | <i>Leptogium</i> | OTU M1 | JR10K493             | Kenya, Mt. Kasigau        | Kasigau W5             | MW335548                    | MW340468 |
| Clade N | <i>Leptogium</i> | OTU N1 | UK170806e            | Tanzania, Mt. Kilimanjaro | FPD4                   | MW335549                    | -        |
| Clade N | <i>Leptogium</i> | OTU N1 | UK170855c            | Tanzania, Mt. Kilimanjaro | FPo4                   | MW335550                    | -        |
| Clade N | <i>Leptogium</i> | OTU N1 | UK170881h            | Tanzania, Mt. Kilimanjaro | FPo5                   | MW335551                    | MW340469 |
| Clade N | <i>Leptogium</i> | OTU N1 | UK170882d            | Tanzania, Mt. Kilimanjaro | FPo5                   | MW335552                    | MW340470 |
| Clade N | <i>Leptogium</i> | OTU N1 | UK170907v            | Tanzania, Mt. Kilimanjaro | FOD5                   | MW335553                    | -        |
| Clade N | <i>Leptogium</i> | OTU N1 | UK170916b            | Tanzania, Mt. Kilimanjaro | Flm6                   | MW335554                    | MW340471 |
| Clade N | <i>Leptogium</i> | OTU N1 | UK171486h            | Tanzania, Mt. Kilimanjaro | FOc4                   | MW335555                    | MW340472 |
| Clade N | <i>Leptogium</i> | OTU N1 | UK171490c            | Tanzania, Mt. Kilimanjaro | FOc3                   | MW335556                    | MW340473 |
| Clade N | <i>Leptogium</i> | OTU N1 | UK171504f            | Tanzania, Mt. Kilimanjaro | FOD2                   | MW335557                    | MW340474 |
| Clade N | <i>Leptogium</i> | OTU N1 | UK171519n            | Tanzania, Mt. Kilimanjaro | FOc5                   | MW335558                    | MW340475 |
| Clade N | <i>Leptogium</i> | OTU N1 | UK171527b            | Tanzania, Mt. Kilimanjaro | FPo2                   | MW335559                    | -        |
| Clade N | <i>Leptogium</i> | OTU N1 | UK171582f            | Tanzania, Mt. Kilimanjaro | FPD2                   | MW335560                    | MW340476 |
| Clade N | <i>Leptogium</i> | OTU N1 | UK171590k            | Tanzania, Mt. Kilimanjaro | FPo3                   | MW335561                    | MW340477 |
| Clade O | <i>Leptogium</i> | OTU O1 | JR11004B             | Kenya, Taita Hills        | Werugha                | MW335562                    | -        |
| Clade O | <i>Leptogium</i> | OTU O1 | UK160551b            | Tanzania, Mt. Kilimanjaro | home 3                 | MW335563                    | MW340478 |
| Clade P | <i>Leptogium</i> | OTU P1 | JR10012              | Kenya, Taita Hills        | Taita Research Station | -                           | JX503899 |
| Clade P | <i>Leptogium</i> | OTU P1 | JR10021              | Kenya, Taita Hills        | Taita Research Station | -                           | JX503900 |
| Clade P | <i>Leptogium</i> | OTU P1 | JR10022A             | Kenya, Taita Hills        | Taita Research Station | MW335564                    | -        |
| Clade P | <i>Leptogium</i> | OTU P1 | JR10022B             | Kenya, Taita Hills        | Taita Research Station | -                           | JX503906 |
| Clade P | <i>Leptogium</i> | OTU P1 | JR10036              | Kenya, Taita Hills        | Shomoto Hill           | -                           | JX503904 |
| Clade P | <i>Leptogium</i> | OTU P1 | JR10054              | Kenya, Taita Hills        | Shomoto Hill           | -                           | JX503901 |
| Clade P | <i>Leptogium</i> | OTU P1 | JR10062              | Kenya, Taita Hills        | Shomoto Hill           | MW335565                    | JX503902 |
| Clade P | <i>Leptogium</i> | OTU P1 | JR10063A             | Kenya, Taita Hills        | Shomoto Hill           | -                           | JX503905 |
| Clade P | <i>Leptogium</i> | OTU P1 | JR10222B             | Kenya, Taita Hills        | Mwachora               | -                           | JX503903 |
| Clade P | <i>Leptogium</i> | OTU P1 | JR10K091a            | Kenya, Mt. Kasigau        | Kasigau N9             | MW335566                    | MW340479 |
| Clade P | <i>Leptogium</i> | OTU P1 | JR10K341b            | Kenya, Mt. Kasigau        | Kasigau S2             | MW335567                    | MW340480 |
| Clade P | <i>Leptogium</i> | OTU P1 | JR10K392Aa           | Kenya, Mt. Kasigau        | Kasigau S7             | MW335568                    | MW340481 |
| Clade P | <i>Leptogium</i> | OTU P1 | JR10K411             | Kenya, Mt. Kasigau        | Kasigau S41            | MW335569                    | MW340482 |

| Clade   |                  |        | Collection<br>number | Collection locality       | Forest/plot            | NCBI Accession No.<br>mtSSU | nuITS    |
|---------|------------------|--------|----------------------|---------------------------|------------------------|-----------------------------|----------|
| Clade P | <i>Leptogium</i> | OTU P1 | JR10K416a            | Kenya, Mt. Kasigau        | Kasigau S41            | MW335570                    | MW340483 |
| Clade P | <i>Leptogium</i> | OTU P1 | JR10K421             | Kenya, Mt. Kasigau        | Kasigau S10            | MW335571                    | MW340484 |
| Clade P | <i>Leptogium</i> | OTU P1 | UK160487a            | Tanzania, Mt. Kilimanjaro | home 4                 | MW335572                    | MW340485 |
| Clade P | <i>Leptogium</i> | OTU P1 | UK160498a            | Tanzania, Mt. Kilimanjaro | home 4                 | MW335573                    | -        |
| Clade P | <i>Leptogium</i> | OTU P1 | UK160557c            | Tanzania, Mt. Kilimanjaro | home 3                 | MW335574                    | -        |
| Clade P | <i>Leptogium</i> | OTU P1 | UK160583a            | Tanzania, Mt. Kilimanjaro | home 2                 | MW335575                    | MW340486 |
| Clade P | <i>Leptogium</i> | OTU P1 | UK170985a            | Tanzania, Mt. Kilimanjaro | Home 5                 | MW335576                    | MW340487 |
| Clade P | <i>Leptogium</i> | OTU P1 | UK170998b            | Tanzania, Mt. Kilimanjaro | Home 5                 | MW335577                    | MW340488 |
| Clade P | <i>Leptogium</i> | OTU P1 | UK171202a            | Tanzania, Mt. Kilimanjaro | Flm3                   | MW335578                    | MW340489 |
| Clade Q | <i>Leptogium</i> | OTU Q1 | JR10019A             | Kenya, Taita Hills        | Taita Research Station | MW335579                    | -        |
| Clade Q | <i>Leptogium</i> | OTU Q1 | JR10045              | Kenya, Taita Hills        | Shomoto Hill           | MW335580                    | -        |
| Clade Q | <i>Leptogium</i> | OTU Q1 | UK170880o            | Tanzania, Mt. Kilimanjaro | FPo5                   | MW335581                    | MW340490 |
| Clade Q | <i>Leptogium</i> | OTU Q1 | UK170896c            | Tanzania, Mt. Kilimanjaro | FPo5                   | MW335582                    | -        |
| Clade Q | <i>Leptogium</i> | OTU Q1 | UK170900d            | Tanzania, Mt. Kilimanjaro | FOD4                   | MW335583                    | -        |
| Clade Q | <i>Leptogium</i> | OTU Q1 | UK170935q            | Tanzania, Mt. Kilimanjaro | Flm1                   | MW335584                    | MW340491 |
| Clade Q | <i>Leptogium</i> | OTU Q1 | UK170936k            | Tanzania, Mt. Kilimanjaro | Flm1                   | MW335585                    | MW340492 |
| Clade Q | <i>Leptogium</i> | OTU Q1 | UK170949b            | Tanzania, Mt. Kilimanjaro | Flm1                   | MW335586                    | MW340493 |
| Clade Q | <i>Leptogium</i> | OTU Q1 | UK171185n            | Tanzania, Mt. Kilimanjaro | FOD3                   | MW335587                    | MW340494 |
| Clade Q | <i>Leptogium</i> | OTU Q1 | UK171506f            | Tanzania, Mt. Kilimanjaro | FOD2                   | MW335588                    | MW340495 |
| Clade Q | <i>Leptogium</i> | OTU Q1 | UK171510g            | Tanzania, Mt. Kilimanjaro | FOD2                   | MW335589                    | MW340496 |
| Clade Q | <i>Leptogium</i> | OTU Q1 | UK171514j            | Tanzania, Mt. Kilimanjaro | FOc5                   | MW335590                    | MW340497 |
| Clade Q | <i>Leptogium</i> | OTU Q1 | UK171521e            | Tanzania, Mt. Kilimanjaro | FOc5                   | MW335591                    | -        |
| Clade Q | <i>Leptogium</i> | OTU Q1 | UK171590g            | Tanzania, Mt. Kilimanjaro | FPo3                   | MW335592                    | MW340498 |
| Clade Q | <i>Leptogium</i> | OTU Q2 | JR10088A             | Kenya, Taita Hills        | Vuria                  | MW335593                    | -        |
| Clade Q | <i>Leptogium</i> | OTU Q2 | JR10114B             | Kenya, Taita Hills        | Vuria                  | MW335594                    | -        |
| Clade Q | <i>Leptogium</i> | OTU Q2 | UK170855e            | Tanzania, Mt. Kilimanjaro | FPo4                   | MW335595                    | -        |
| Clade Q | <i>Leptogium</i> | OTU Q2 | UK171397b            | Tanzania, Mt. Kilimanjaro | FEr4                   | MW335596                    | -        |
| Clade Q | <i>Leptogium</i> | OTU Q2 | UK171586v            | Tanzania, Mt. Kilimanjaro | FPo3                   | MW335597                    | -        |
| Clade Q | <i>Leptogium</i> | OTU Q2 | UK171591b            | Tanzania, Mt. Kilimanjaro | FPo3                   | MW335598                    | -        |
| Clade Q | <i>Leptogium</i> | OTU Q3 | UK170897a            | Tanzania, Mt. Kilimanjaro | FOD4                   | MW335599                    | MW340499 |
| Clade Q | <i>Leptogium</i> | OTU Q3 | UK170940b            | Tanzania, Mt. Kilimanjaro | Flm1                   | MW335600                    | MW340500 |
| Clade Q | <i>Leptogium</i> | OTU Q4 | UK170882a            | Tanzania, Mt. Kilimanjaro | FPo5                   | MW335601                    | -        |
| Clade Q | <i>Leptogium</i> | OTU Q4 | UK170920d            | Tanzania, Mt. Kilimanjaro | Flm6                   | MW335602                    | -        |
| Clade Q | <i>Leptogium</i> | OTU Q4 | UK171597a            | Tanzania, Mt. Kilimanjaro | Flm2                   | MW335603                    | -        |
| Clade R | <i>Leptogium</i> | sp.    | JR_W1B_R2            | Kenya, Mt. Kasigau        | Kasigau                | -                           | JX503907 |
| Clade R | <i>Leptogium</i> | sp.    | UK160559f            | Tanzania, Mt. Kilimanjaro | Home 3                 | MW335604                    | -        |
| Clade R | <i>Leptogium</i> | sp.    | UK170881i            | Tanzania, Mt. Kilimanjaro | FPo5                   | MW335605                    | MW340501 |
| Clade R | <i>Leptogium</i> | sp.    | UK170909b            | Tanzania, Mt. Kilimanjaro | FOD5                   | MW335606                    | MW340502 |
| Clade R | <i>Leptogium</i> | sp.    | UK171204a            | Tanzania, Mt. Kilimanjaro | Flm3                   | MW335607                    | MW340503 |
| Clade R | <i>Leptogium</i> | OTU R1 | JR10030B             | Kenya, Taita Hills        | Shomoto Hill           | -                           | JX503925 |
| Clade R | <i>Leptogium</i> | OTU R1 | JR10030C             | Kenya, Taita Hills        | Shomoto Hill           | MW335608                    | -        |
| Clade R | <i>Leptogium</i> | OTU R1 | JR10277B             | Kenya, Taita Hills        | Macha                  | MW335609                    | JX503927 |
| Clade R | <i>Leptogium</i> | OTU R1 | JR11001              | Kenya, Taita Hills        | Werugha                | MW335610                    | JX503926 |
| Clade R | <i>Leptogium</i> | OTU R1 | JR11004A             | Kenya, Taita Hills        | Werugha                | MW335611                    | JX503928 |
| Clade R | <i>Leptogium</i> | OTU R2 | JR10038B             | Kenya, Taita Hills        | Shomoto Hill           | -                           | JX503924 |
| Clade R | <i>Leptogium</i> | OTU R2 | UK171189a            | Tanzania, Mt. Kilimanjaro | Flm4                   | MW335612                    | MW340504 |
| Clade R | <i>Leptogium</i> | OTU R3 | JR10186B             | Kenya, Taita Hills        | Yale                   | -                           | JX503923 |
| Clade R | <i>Leptogium</i> | OTU R3 | UK170912g            | Tanzania, Mt. Kilimanjaro | FOD5                   | MW335613                    | MW340505 |
| Clade R | <i>Leptogium</i> | OTU R3 | UK171482d            | Tanzania, Mt. Kilimanjaro | FOc4                   | MW335614                    | MW340506 |
| Clade R | <i>Leptogium</i> | OTU R3 | UK171494e            | Tanzania, Mt. Kilimanjaro | FOc3                   | MW335615                    | MW340507 |
| Clade R | <i>Leptogium</i> | OTU R3 | UK171494f            | Tanzania, Mt. Kilimanjaro | FOc3                   | MW335616                    | MW340508 |
| Clade R | <i>Leptogium</i> | OTU R3 | UK171504g            | Tanzania, Mt. Kilimanjaro | FOD2                   | MW335617                    | MW340509 |
| Clade R | <i>Leptogium</i> | OTU R4 | UK170845t            | Tanzania, Mt. Kilimanjaro | FPD3                   | MW335618                    | MW340510 |
| Clade R | <i>Leptogium</i> | OTU R4 | UK170845u            | Tanzania, Mt. Kilimanjaro | FPD3                   | MW335619                    | MW340511 |
| Clade R | <i>Leptogium</i> | OTU R4 | UK171320j            | Tanzania, Mt. Kilimanjaro | FED1                   | MW335620                    | MW340512 |
| Clade R | <i>Leptogium</i> | OTU R4 | UK171469d            | Tanzania, Mt. Kilimanjaro | FPD1                   | MW335621                    | MW340513 |
| Clade R | <i>Leptogium</i> | OTU R4 | UK171473f            | Tanzania, Mt. Kilimanjaro | FPD1                   | MW335622                    | MW340514 |
| Clade R | <i>Leptogium</i> | OTU R4 | UK171527c            | Tanzania, Mt. Kilimanjaro | FPo2                   | MW335623                    | MW340515 |
| Clade R | <i>Leptogium</i> | OTU R4 | UK171582n            | Tanzania, Mt. Kilimanjaro | FPD2                   | MW335624                    | MW340516 |
| Clade R | <i>Leptogium</i> | OTU R5 | UK171320h            | Tanzania, Mt. Kilimanjaro | FED1                   | MW335625                    | MW340517 |

|         |                  |        | Collection<br>number | Collection locality       | Forest/plot  | NCBI Accession No. |          |
|---------|------------------|--------|----------------------|---------------------------|--------------|--------------------|----------|
| Clade   |                  |        |                      |                           |              | mtSSU              | nuITS    |
| Clade R | <i>Leptogium</i> | OTU R5 | UK171590n            | Tanzania, Mt. Kilimanjaro | FPo3         | MW335626           | MW340518 |
| Clade R | <i>Leptogium</i> | OTU R6 | JR10033B             | Kenya, Taita Hills        | Shomoto Hill | MW335627           | JX503920 |
| Clade R | <i>Leptogium</i> | OTU R6 | JR10035              | Kenya, Taita Hills        | Shomoto Hill | MW335628           | JX503919 |
| Clade R | <i>Leptogium</i> | OTU R6 | JR10040A             | Kenya, Taita Hills        | Shomoto Hill | -                  | JX503914 |
| Clade R | <i>Leptogium</i> | OTU R6 | JR10041Aa            | Kenya, Taita Hills        | Shomoto Hill | MW335629           | JX503917 |
| Clade R | <i>Leptogium</i> | OTU R6 | JR10050              | Kenya, Taita Hills        | Shomoto Hill | -                  | JX503915 |
| Clade R | <i>Leptogium</i> | OTU R6 | JR10053C             | Kenya, Taita Hills        | Shomoto Hill | -                  | JX503916 |
| Clade R | <i>Leptogium</i> | OTU R6 | JR10206A             | Kenya, Taita Hills        | Yale         | -                  | JX503909 |
| Clade R | <i>Leptogium</i> | OTU R6 | JR10206B             | Kenya, Taita Hills        | Yale         | -                  | JX503910 |
| Clade R | <i>Leptogium</i> | OTU R6 | JR10260A             | Kenya, Taita Hills        | Mwachora     | -                  | JX503911 |
| Clade R | <i>Leptogium</i> | OTU R6 | JR10277C             | Kenya, Taita Hills        | Macha        | MW335630           | -        |
| Clade R | <i>Leptogium</i> | OTU R6 | JR10279C             | Kenya, Taita Hills        | Macha        | MW335631           | JX503912 |
| Clade R | <i>Leptogium</i> | OTU R6 | JR10K531A            | Kenya, Mt. Kasigau        | Kasigau W9   | MW335632           | MW340519 |
| Clade R | <i>Leptogium</i> | OTU R6 | JR11009B             | Kenya, Taita Hills        | Vuria        | -                  | JX503913 |
| Clade R | <i>Leptogium</i> | OTU R6 | JR11010B             | Kenya, Taita Hills        | Vuria        | MW335633           | JX503908 |
| Clade R | <i>Leptogium</i> | OTU R6 | JR11054E             | Kenya, Taita Hills        | Vuria        | MW335634           | -        |
| Clade R | <i>Leptogium</i> | OTU R6 | JR11088B             | Kenya, Taita Hills        | Chawia       | -                  | JX503918 |
| Clade R | <i>Leptogium</i> | OTU R6 | UK170916a            | Tanzania, Mt. Kilimanjaro | Flm6         | MW335635           | MW340520 |
| Clade R | <i>Leptogium</i> | OTU R6 | UK170927g            | Tanzania, Mt. Kilimanjaro | Flm6         | MW335636           | MW340521 |
| Clade R | <i>Leptogium</i> | OTU R6 | UK171486g            | Tanzania, Mt. Kilimanjaro | FOc4         | MW335637           | MW340522 |
| Clade R | <i>Leptogium</i> | OTU R6 | UK171486j            | Tanzania, Mt. Kilimanjaro | FOc4         | MW335638           | MW340523 |
| Clade R | <i>Leptogium</i> | OTU R7 | JR_W5B               | Kenya, Mt. Kasigau        | Kasigau      | MW335639           | JX503922 |
| Clade R | <i>Leptogium</i> | OTU R7 | JR_W9                | Kenya, Mt. Kasigau        | Kasigau      | MW335640           | JX503921 |
| Clade R | <i>Leptogium</i> | OTU R7 | JR10K492a            | Kenya, Mt. Kasigau        | Kasigau W5   | MW335641           | MW340524 |
| Clade R | <i>Leptogium</i> | OTU R8 | UK160552d            | Tanzania, Mt. Kilimanjaro | Home 3       | MW335642           | -        |
| Clade R | <i>Leptogium</i> | OTU R8 | UK170933e            | Tanzania, Mt. Kilimanjaro | Flm1         | MW335643           | MW340525 |
| Clade R | <i>Leptogium</i> | OTU R8 | UK170950g            | Tanzania, Mt. Kilimanjaro | Flm1         | MW335644           | MW340526 |
| Clade R | <i>Leptogium</i> | OTU R9 | UK171470b            | Tanzania, Mt. Kilimanjaro | FPD1         | MW335645           | MW340527 |
| Clade R | <i>Leptogium</i> | OTU R9 | UK171519p            | Tanzania, Mt. Kilimanjaro | FOc5         | MW335646           | MW340528 |
| Clade R | <i>Leptogium</i> | OTU R9 | UK171523e            | Tanzania, Mt. Kilimanjaro | FPo2         | MW335647           | MW340529 |
| Clade R | <i>Leptogium</i> | OTU R9 | UK171584h            | Tanzania, Mt. Kilimanjaro | FPD2         | MW335648           | MW340530 |
| Clade R | <i>Leptogium</i> | OTU R9 | UK171586ah           | Tanzania, Mt. Kilimanjaro | FPo3         | MW335649           | MW340531 |
| Clade R | <i>Leptogium</i> | OTU R9 | UK171586u            | Tanzania, Mt. Kilimanjaro | FPo3         | MW335650           | MW340532 |
| Clade R | <i>Leptogium</i> | OTU R9 | UK171587d            | Tanzania, Mt. Kilimanjaro | FPo3         | MW335651           | MW340533 |
